# Supplementary material for: Nickel-catalyzed reductive allylation of aryl bromides with allylic acetates
Source: Royal Society of Chemistry journal article supplement (doi:10.1039/c3ob40232k), 2013-01-01
Supplement: c3ob40232k.pdf [file c3ob40232k.pdf]

## Supplementary Information

### Nickel-Catalyzed Reductive Allylation of Aryl Halides with Allylic Acetates

Xiaozhan Cui,<sup>a</sup> Shulin Wang,<sup>a</sup> Yuwei Zhang,<sup>b</sup> Qun Qian<sup>\*a</sup> and Hegui Gong<sup>\*a</sup>

<sup>a</sup> Department of Chemistry, Shanghai University, 99 Shang-Da Road, Shanghai 200444, China.

<sup>b</sup> College of Chemistry and Molecular Engineering, Zhengzhou University, 100 Science Road, Zhengzhou 450001, China.

Hegui\_gong@shu.edu.cn

#### Table of Contents

|                                                                                        |     |
|----------------------------------------------------------------------------------------|-----|
| 1. Instrumentation and Chemicals.....                                                  | S2  |
| 2. General Procedure for Reductive Coupling of Aryl Halides with Allylic Acetates..... | S2  |
| 3. Spectral Data of New Compounds.....                                                 | S3  |
| 4. Synthesis the Key Ligand 3a. ....                                                   | S5  |
| 5. Examination of in situ organozinc formation.....                                    | S6  |
| 6. <sup>1</sup> H and <sup>13</sup> C NMR Spectra of Coupling Products.....            | S7  |
| 7. The Data of HPLC for Asymmetric Coupling of 1,3-Disubstituted Allyl Acetate. ....   | S15 |
| 8. The references for known products.....                                              | S17 |

## ***1. Instrumentation and Chemicals***

All reagents were reagent grade quality and used as received from Aladdin Co. (China), unless otherwise indicated. All reactions were carried out under an atmosphere of nitrogen unless otherwise indicated. Anhydrous THF and Toluene were distilled from sodium/benzophenone ketyl prior to use. Anhydrous DCM and MeOH were distilled over CaH<sub>2</sub>. All other solvents were technical grade unless noted. Anhydrous DMF (Acros), DMA (anhydrous and 99.5% ultrapure, Acros), NiCl<sub>2</sub> (Alfa Aesar), NiBr<sub>2</sub> (Alfa Aesar), NiI<sub>2</sub> (anhydrous, Alfa Aesar), Ni(COD)<sub>2</sub> (Aldrich), zinc powder (Aldrich), anhydrous MgCl<sub>2</sub> (Alfa Aesar), **1a**, **1b**, **1c**, **4a**, **4b**, **4c** (Aldrich) were purchased, **6**<sup>1</sup>, **8**<sup>2</sup> were synthesized according to the literature procedures. All HPLC solvents were obtained from Aldrich.

Column chromatography was performed using silica gel 300-400 mesh (purchased from QingdaoHaiyang Co. China) as the solid support. All NMR spectra were recorded on Bruker Avance 500 MHz spectrometer at STP unless otherwise indicated. <sup>1</sup>H NMR and <sup>13</sup>C NMR chemical shifts are reported in δ units, parts per million (ppm) relative to the chemical shift of residual solvent. Deuterated solvents were used as received from Cambridge Isotope Laboratories, Inc. NMR chemical shifts are reported in units, parts per million (ppm) relative to the chemical shift of residual solvent. Reference peaks for chloroform in <sup>1</sup>H NMR and <sup>13</sup>C NMR spectra were set at 7.26 ppm and 77.36 ppm, respectively. High-resolution mass spectra (HRMS) were obtained using a Bruker APEXIII 7.0 and IonSpec 4.7 TESLA FTMS. IR data were obtained using an AVATAR370. HPLC spectra were obtained using a SHIMADZU, LC-2010AHT and chromatographic column (CHIRALPAK. AD-H, Lot No. ADHOCE-OB110; DAICEL CHEMICAL INDUSTRIES, LTD.).

## ***2. Reductive Coupling of Aryl Halides with Allylic Acetates***

**General Procedure for Reductive Coupling of Aryl Halides with Allylic Acetates:** To a flame-dried Schlenk tube equipped with a magnetic stir bar was loaded alkyl bromide (0.15 mmol, 100 mol%), followed by addition of 4-chloro-2-(4,5-dihydro-1H-imidazol-2-yl)pyridine (**3a**) (2.7 mg, 0.015 mmol, 10 mol%), zinc powder (19.6 mg, 0.3 mmol, 200 mol%) and Bu<sub>4</sub>NBr (48.4 mg, 0.15 mmol, 100 mol%). The tube was moved into a dry glove box, at which point NiI<sub>2</sub> (4.7 mg, 0.015 mmol, 10 mol%) and MgCl<sub>2</sub> (14.3 mg, 0.15 mmol, 100 mol%) were added. The tube was

capped with a rubber septum, and it was moved out of the glove box. Allylic Acetates (0.3 mmol, 200 mol%), pyridine (11.9 mg, 0.15 mmol, 100 mol%) and DMA (1.0 mL) were then added via syringe. After the reaction mixture was allowed to stir for 12 h under N<sub>2</sub> atmosphere at 60 °C, it was directly loaded onto a silica column without work-up. The residue in the reaction vessel was rinsed with small amount of DCM. Flash column chromatography (SiO<sub>2</sub>: ethyl acetate in petroleum ether) provided the coupling product.

### 3. Spectral Data of New Compounds

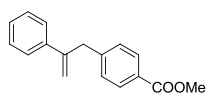

#### ***methyl 4-(2-phenylallyl)benzoate(24).***

Colorless oil. Yield: 94% (36 mg); purification by column chromatography (SiO<sub>2</sub>: 5% ethyl acetate in petroleum ether); <sup>1</sup>H NMR (500 MHz, CDCl<sub>3</sub>) δ 7.96 – 7.91 (m, 2H), 7.40 (dd, *J* = 8.2, 1.2 Hz, 2H), 7.34 – 7.20 (m, 5H), 5.52 (d, *J* = 0.7 Hz, 1H), 5.05 (d, *J* = 1.2 Hz, 1H), 3.89 (s, 5H); <sup>13</sup>C NMR (126 MHz, CDCl<sub>3</sub>): δ 167.44, 146.53, 145.40, 140.70, 130.05, 129.27, 128.67, 128.49, 127.97, 126.45, 115.43, 52.33, 42.04; IR (KBr) ν 3419.32, 2920.47, 2850.45, 1721.06, 1610.93, 1434.87, 1280.96, 1109.55, 1020.50, 900.37, 779.05, 702.78; HRMS (ESI) calcd. For C<sub>17</sub>H<sub>16</sub>O<sub>2</sub> [MH<sup>+</sup>]: 252.1150; Found: 252.1145.

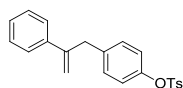

#### ***4-(2-phenylallyl)phenyl 4-methylbenzenesulfonate(30).***

Colorless oil. Yield: 82% (45 mg); purification by column chromatography (SiO<sub>2</sub>: 5% ethyl acetate in petroleum ether); <sup>1</sup>H NMR (500 MHz, CDCl<sub>3</sub>) δ 7.65 (d, *J* = 8.2 Hz, 2H), 7.38 (s, 2H), 7.28 (ddd, *J* = 21.7, 19.4, 17.2 Hz, 6H), 7.12 (d, *J* = 8.5 Hz, 2H), 6.87 (d, *J* = 8.5 Hz, 2H), 5.48 (s, 1H), 4.99 (s, 1H), 3.79 (s, 2H), 2.43 (s, 3H); <sup>13</sup>C NMR (126 MHz, CDCl<sub>3</sub>): δ 148.31, 146.81, 145.54, 140.73, 138.89, 132.73, 130.31, 129.99, 128.86, 128.62, 127.93, 126.44, 122.57, 115.20, 41.33, 22.05; IR (KBr) ν 3438.25, 3094.26, 3049.14, 2920.33, 2850.68, 1629.01, 1597.13, 1499.65, 1368.69, 1197.10, 1176.06, 1152.41, 1093.29, 910.82, 857.59, 814.59, 777.38, 706.89, 660.95, 576.13, 552.51; HRMS (ESI) calcd. For C<sub>22</sub>H<sub>20</sub>O<sub>3</sub>S [MH<sup>+</sup>]: 364.1133; Found: 364.1130.

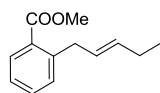

**(E)-methyl 2-(pent-2-en-1-yl)benzoate(27).**

Colorless oil. Yield: 89% (27 mg); purification by column chromatography (SiO<sub>2</sub>: 5% ethyl acetate in petroleum ether); <sup>1</sup>H NMR (500 MHz, CDCl<sub>3</sub>) δ 7.84 (dd, *J* = 7.7, 1.1 Hz, 1H), 7.43 (td, *J* = 7.6, 1.3 Hz, 1H), 7.31 – 7.20 (m, 2H), 5.63 – 5.45 (m, 2H), 3.89 (s, 3H), 3.68 (d, *J* = 6.2 Hz, 2H), 2.07 – 1.96 (m, 2H), 0.96 (t, *J* = 7.4 Hz, 3H); <sup>13</sup>C NMR (126 MHz, CDCl<sub>3</sub>): δ 168.60, 142.84, 133.86, 132.25, 131.05, 130.74, 130.09, 127.94, 126.27, 52.24, 37.56, 25.92, 14.14; IR (KBr) ν 3026.73, 2961.92, 2930.78, 2873.30, 2850.16, 1724.50, 1448.52, 1264.22, 1079.62, 968.73, 750.45; HRMS (ESI) calcd. For C<sub>13</sub>H<sub>16</sub>O<sub>2</sub> [MH<sup>+</sup>]: 204.1150; Found: 204.1148.

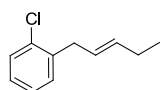

**(E)-1-chloro-2-(pent-2-en-1-yl)benzene(28).**

Colorless oil. Yield: 91% (35 mg); purification by column chromatography (SiO<sub>2</sub>: 2% ethyl acetate in petroleum ether); <sup>1</sup>H NMR (500 MHz, CDCl<sub>3</sub>) δ 7.34 (dd, *J* = 7.8, 1.1 Hz, 1H), 7.18 (dq, *J* = 27.4, 7.5, 1.8 Hz, 3H), 5.59 – 5.53 (m, 2H), 3.44 (d, *J* = 2.8 Hz, 2H), 2.10 – 1.94 (m, 2H), 0.99 (t, *J* = 7.4 Hz, 3H); <sup>13</sup>C NMR (126 MHz, CDCl<sub>3</sub>): δ 139.08, 134.72, 134.30, 130.60, 129.70, 127.66, 127.09, 126.09, 36.80, 25.91, 14.08; IR (KBr) ν 3065.34, 3027.21, 2963.60, 2931.12, 2873.04, 2848.68, 1473.05, 1441.95, 1051.04, 1037.64, 967.98, 749.40, 680.10; HRMS (ESI) calcd. For C<sub>11</sub>H<sub>13</sub>Cl [MH<sup>+</sup>]: 180.0706; Found: 180.0705.

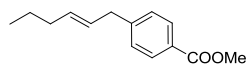

**(E)-methyl 4-(hex-2-en-1-yl)benzoate(21).**

Colorless oil. Yield: 85% (28 mg); purification by column chromatography (SiO<sub>2</sub>: 5% ethyl acetate in petroleum ether); <sup>1</sup>H NMR (500 MHz, CDCl<sub>3</sub>) δ 7.99 – 7.92 (m, 2H), 7.25 (d, *J* = 8.3 Hz, 2H), 5.60 – 5.47 (m, 2H), 3.90 (s, 3H), 3.38 (d, *J* = 5.0 Hz, 2H), 2.01 (dd, *J* = 13.5, 6.4 Hz, 2H), 1.40 (dd, *J* = 14.7, 7.4 Hz, 2H), 0.90 (t, *J* = 7.4 Hz, 3H); <sup>13</sup>C NMR (126 MHz, CDCl<sub>3</sub>): δ 167.19, 146.67, 132.77, 129.71, 128.51, 127.89, 51.98, 39.05, 34.59, 22.54, 13.67; IR (KBr) ν 2956.20, 2926.22, 2852.64, 1724.40, 1611.03, 1435.30, 1280.02, 1192.28, 1110.64, 1020.51, 968.73, 750.45; HRMS (ESI) calcd. For C<sub>14</sub>H<sub>18</sub>O<sub>2</sub> [MH<sup>+</sup>]: 218.1307; Found: 218.1305.

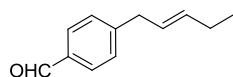

**(E)-4-(pent-2-en-1-yl)benzaldehyde(26).**

Colorless oil. Yield: 80% (21 mg); purification by column chromatography (SiO<sub>2</sub>: 5% ethyl acetate in petroleum ether); <sup>1</sup>H NMR (500 MHz, CDCl<sub>3</sub>) δ 9.97 (s, 1H), 7.80 (d, *J* = 8.2 Hz, 2H), 7.35 (d, *J* = 8.0 Hz, 2H), 5.64 – 5.42 (m, 2H), 3.40 (d, *J* = 6.1 Hz, 2H), 2.11 – 1.99 (m, 2H), 1.00 (t, *J* = 7.4 Hz, 3H); <sup>13</sup>C NMR (126 MHz, CDCl<sub>3</sub>): δ 192.38, 148.94, 135.12, 134.92, 130.30, 129.50, 126.73, 39.51, 25.87, 14.05; IR (KBr) ν 3449.48, 2960.11, 2921.40, 2850.47, 2730.68, 1704.41, 1606.06, 1461.29, 1305.27, 1211.84, 1167.77, 968.52, 849.59, 829.88; HRMS (ESI) calcd. For C<sub>12</sub>H<sub>14</sub>O [MH<sup>+</sup>]: 174.1045; Found: 174.1047.

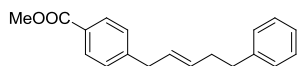

**(E)-methyl 4-(5-phenylpent-2-en-1-yl)benzoate(18).**

Colorless oil. Yield: 87% (37 mg); purification by column chromatography (SiO<sub>2</sub>: 5% ethyl acetate in petroleum ether). <sup>1</sup>H NMR (500 MHz, CDCl<sub>3</sub>) δ 7.95 (d, *J* = 8.2 Hz, 2H), 7.29 (t, *J* = 7.4 Hz, 2H), 7.19 (dd, *J* = 14.5, 7.7 Hz, 5H), 5.56 (t, *J* = 3.7 Hz, 2H), 3.91 (s, 3H), 3.37 (d, *J* = 3.5 Hz, 2H), 2.76 – 2.67 (m, 2H), 2.38 (dd, *J* = 11.0, 7.0 Hz, 2H); <sup>13</sup>C NMR (126 MHz, CDCl<sub>3</sub>): δ 167.49, 146.70, 142.13, 132.20, 130.02, 128.86, 128.62, 128.23, 126.13, 52.32, 39.27, 36.12, 34.59; IR (KBr) ν 3415.75, 3027.09, 2924.28, 2852.25, 1721.67, 1609.90, 1435.14, 1280.74, 1109.89, 968.80, 758.55, 699.94; HRMS (ESI) calcd. For C<sub>19</sub>H<sub>20</sub>O<sub>2</sub> [MH<sup>+</sup>]: 280.1463; Found: 280.1464.

#### **4. Synthesis the Key Ligand 3a.**

**4-Chloro-2-(4,5-dihydro-1H-imidazol-2-yl)pyridine(3a).** Following the literature procedures,<sup>3</sup> sodium methoxide (7.8 mg, 0.144 mmol, 10 mol %) was added to a solution of 4-chloropicolinonitrile (200 mg, 1.44 mmol, 100 mol %) in methanol (1.5 mL). After the reaction mixture was allowed to stir for 15 h under N<sub>2</sub> atmosphere at 25 °C, it was directly loaded onto a silica column without work-up. The residue in the reaction vessel was rinsed with small amount of DCM. Flash column chromatography (SiO<sub>2</sub>: 30% ethyl acetate in hexanes) provided methyl 4-chloropicolinimidate as a colorless oil (209 mg, 1.22 mmol, 85% yield).

Ethylene diamine (0.15 mL, 2.32 mmol, 493 mol %) was added to a mixture of methyl 4-chloropicolinimidate (80mg, 0.47 mmol, 100 mol %) in MeOH (1.5 mL). The reaction mixture

was allowed to stir for 20 h under N<sub>2</sub> atmosphere at 50 °C. The solution was cooled to room temperature and quenched with H<sub>2</sub>O (5 mL) and diluted with CH<sub>2</sub>Cl<sub>2</sub> (5 mL). The layers were separated and the aqueous layer was extracted with DCM (2 x 5 mL). The combined organic layers were dried over MgSO<sub>4</sub>, filtered, concentrated under reduced pressure to provided **3a** as a light yellow solid (68 mg, 0.376 mmol, 80% yield).

White solid, M.p. = 77-78 °C; <sup>1</sup>H NMR (500 MHz, DMSO): δ 8.60 (dd, *J* = 5.5, 0.5 Hz, 1H), 8.03 (d, *J* = 2.2 Hz, 1H), 7.65 (dd, *J* = 5.5, 2.2 Hz, 1H), 7.05 (s, 1H), 3.64 (s, 4H). <sup>13</sup>C NMR (125 MHz, DMSO): δ 162.7, 150.4, 150.4, 143.3, 125.2, 121.9. IR (KBr) ν 3404.41, 3366.61, 3129.82, 3102.11, 3042.73, 2994.41, 2953.90, 2867.58, 2477.48, 1940.50, 1817.74, 1775.85, 1696.72, 1614.94, 1579.14, 1553.27, 1495.55, 1472.91, 1456.77, 1384.40, 1321.03, 1287.14, 1275.96, 1236.91, 1183.14, 1136.25, 1083.26, 1025.92, 979.23, 890.57, 848.65, 766.33, 689.71, 610.56, 532.32; MS (EI) *m/z* (M<sup>+</sup>) calcd for C<sub>8</sub>H<sub>8</sub>ClN<sub>3</sub>: 181, found: 181.

### 5. Examination of *in situ* organozinc formation.

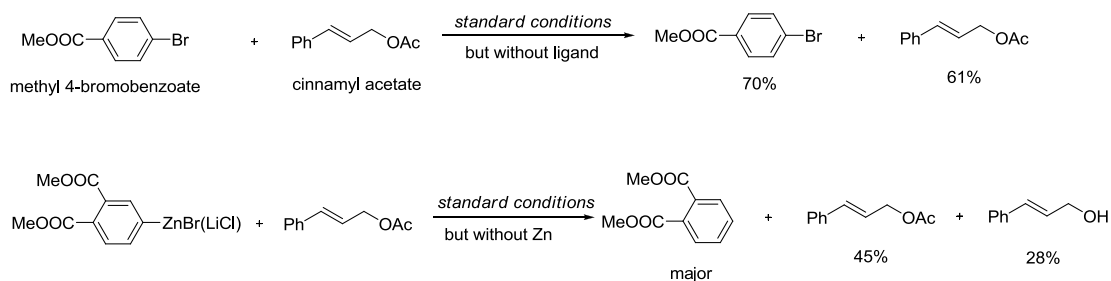

## 6. $^1\text{H}$ and $^{13}\text{C}$ NMR Spectra of Reductive Coupling Products & Ligand 3a

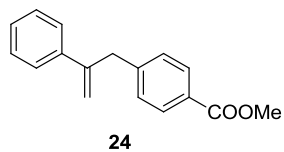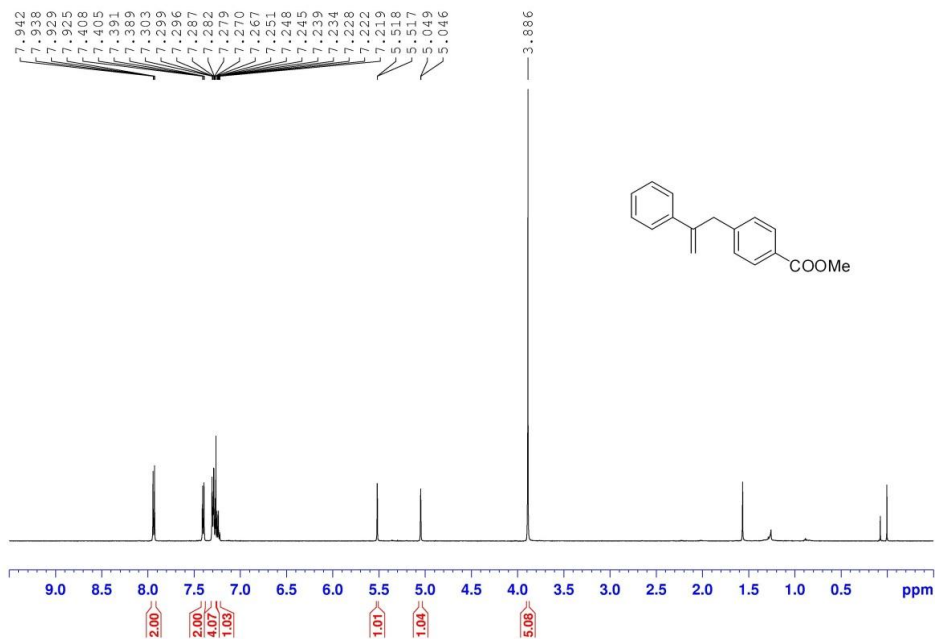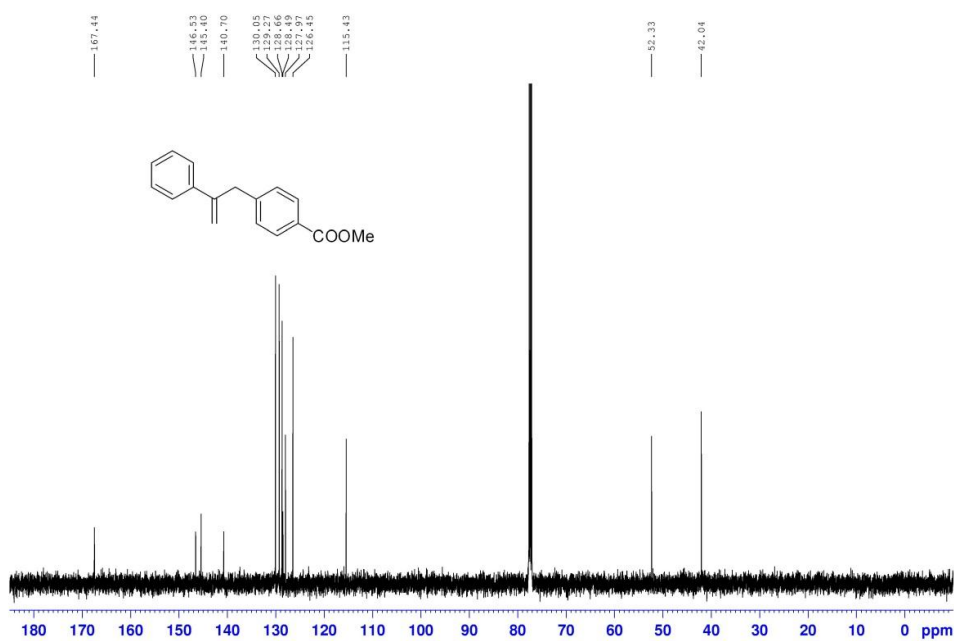

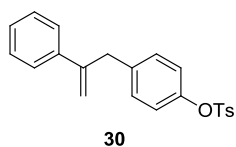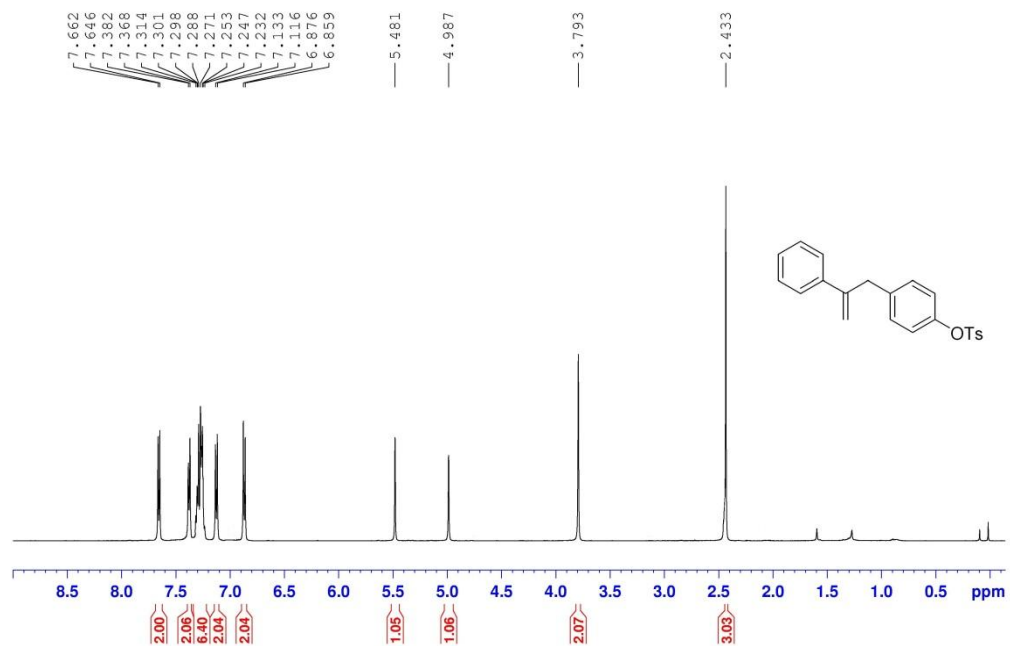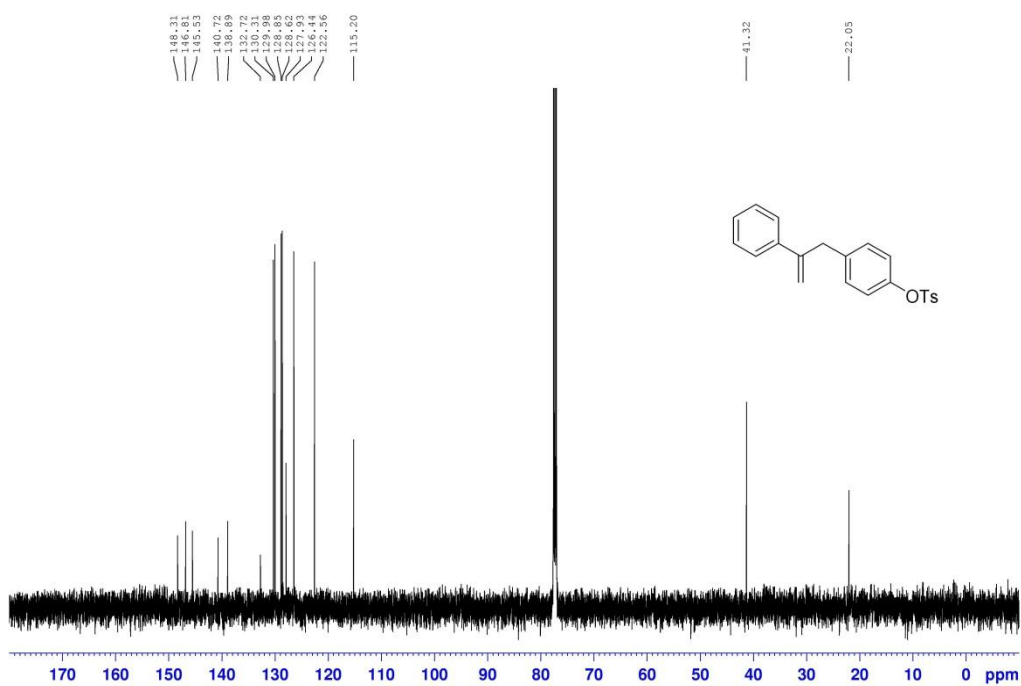



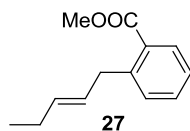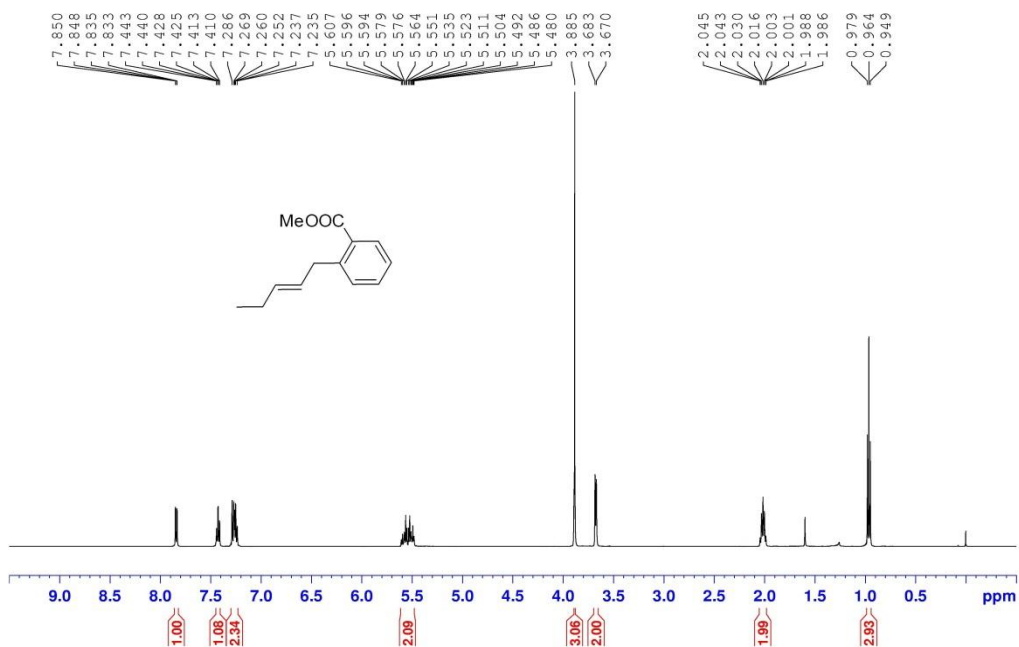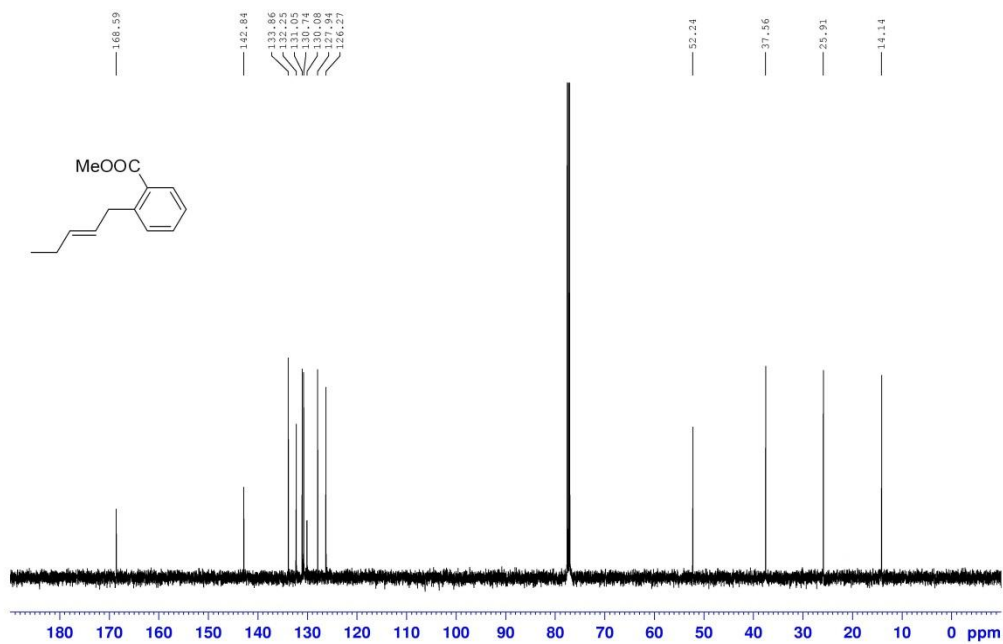

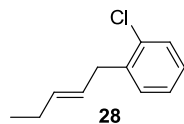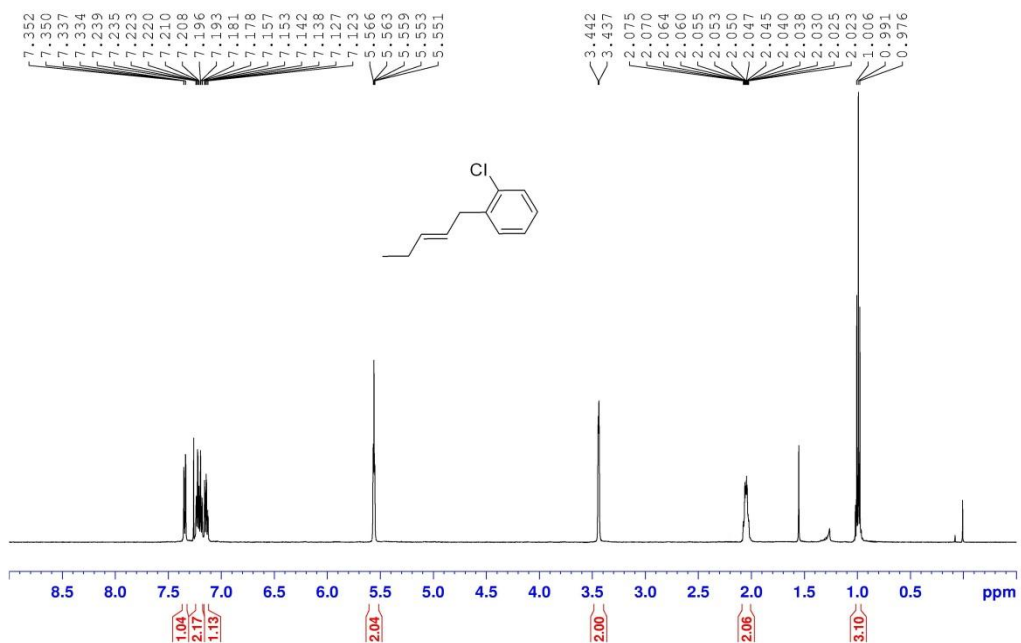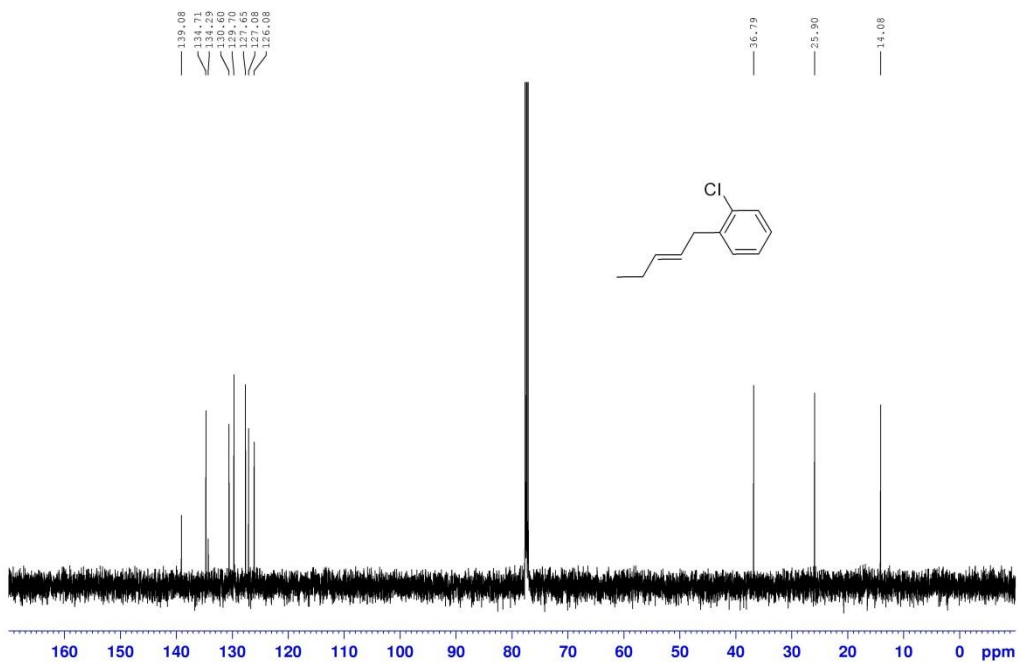

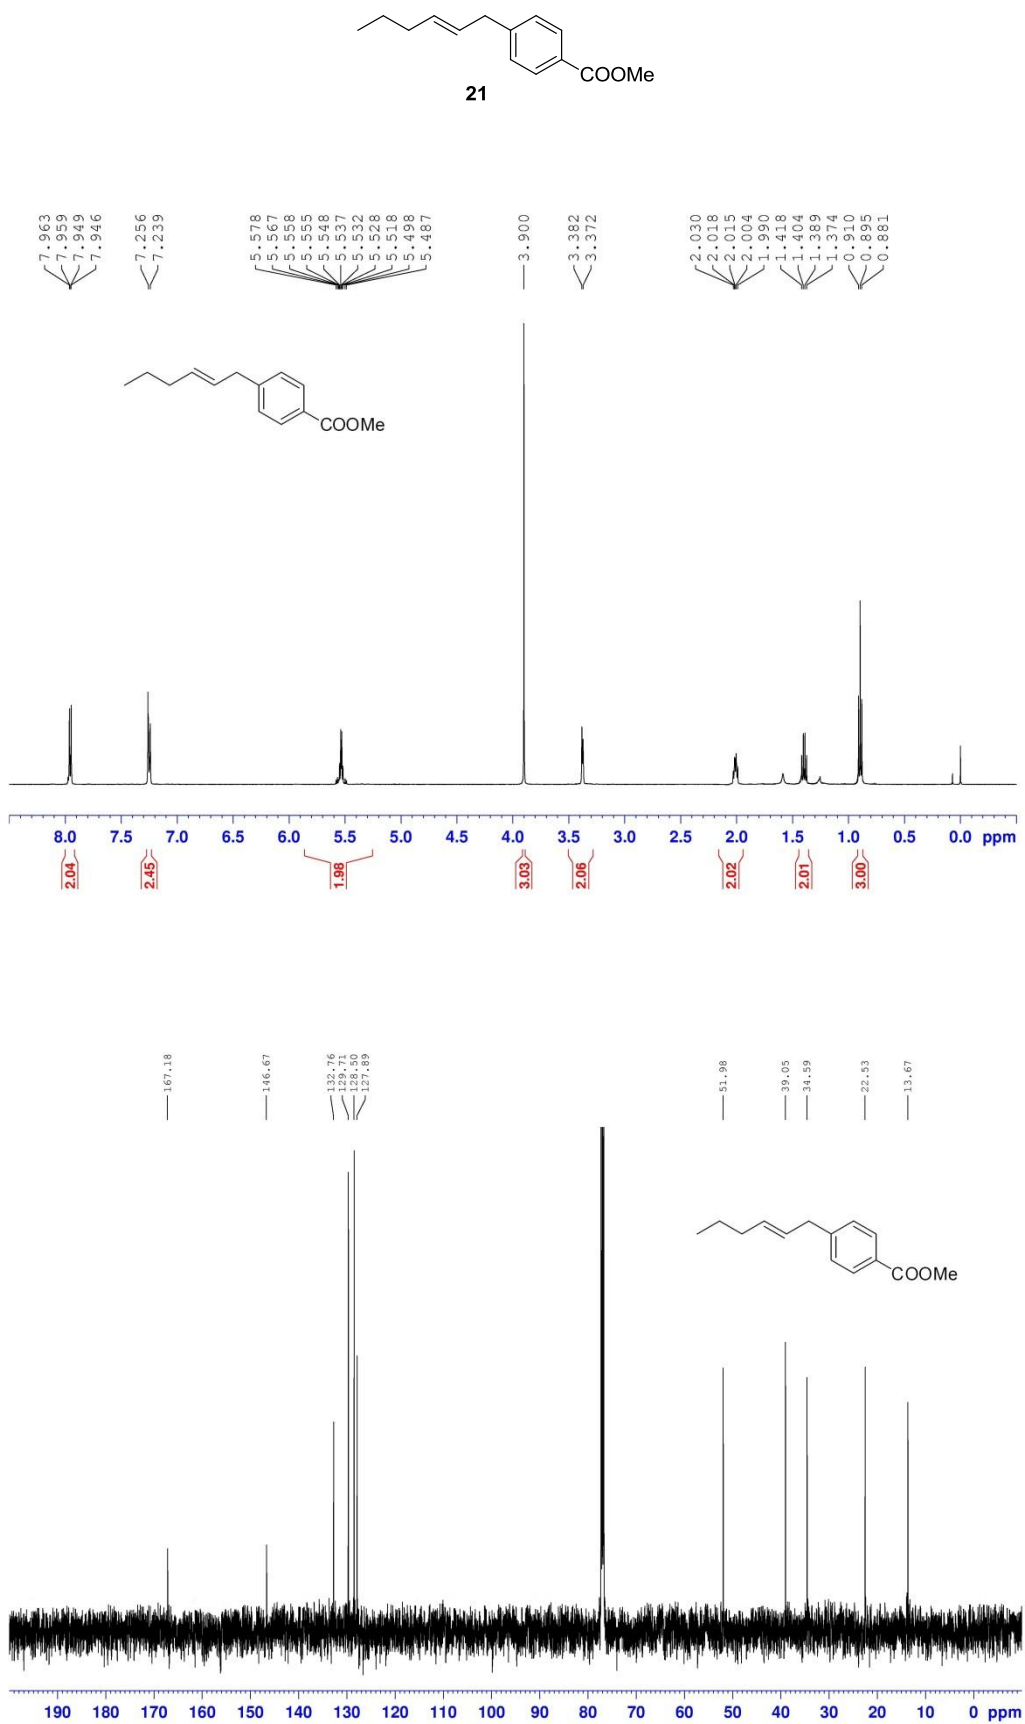

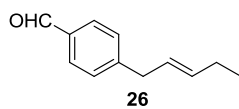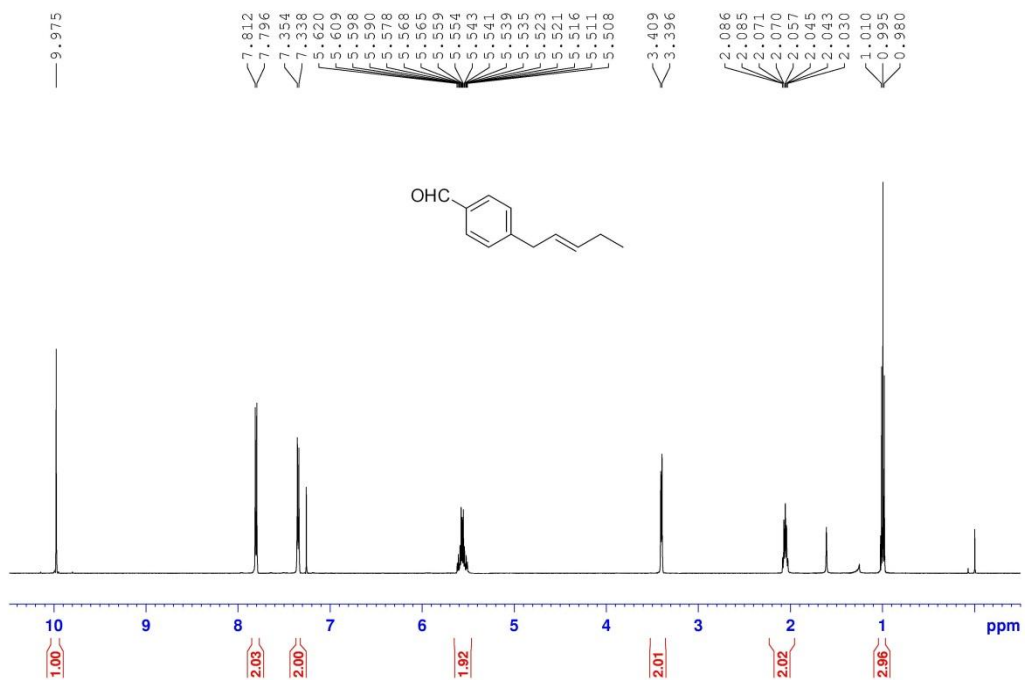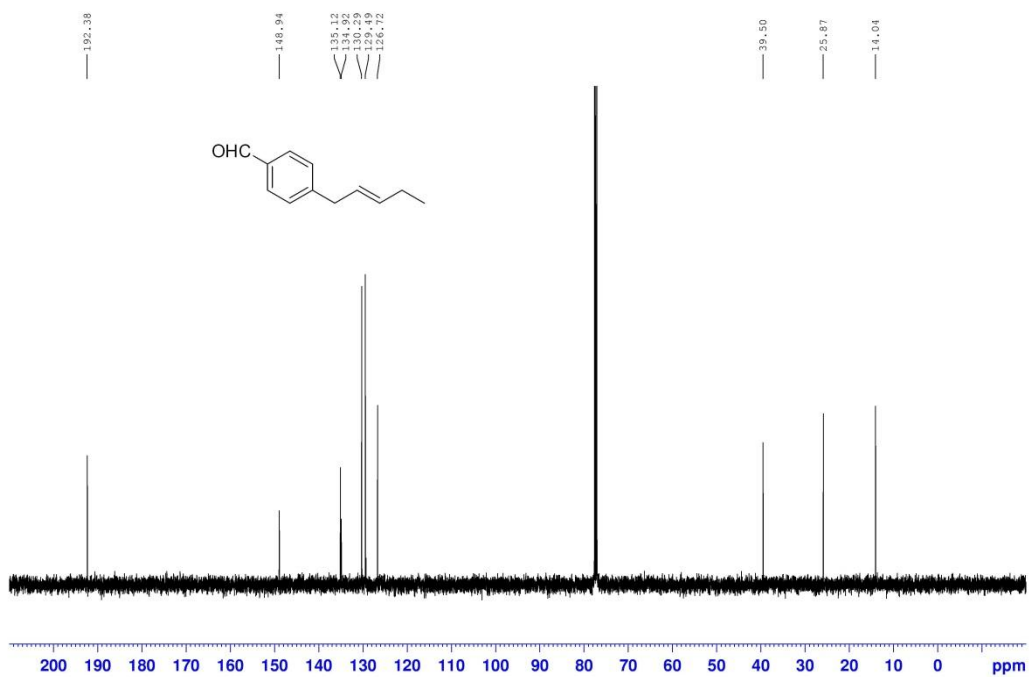

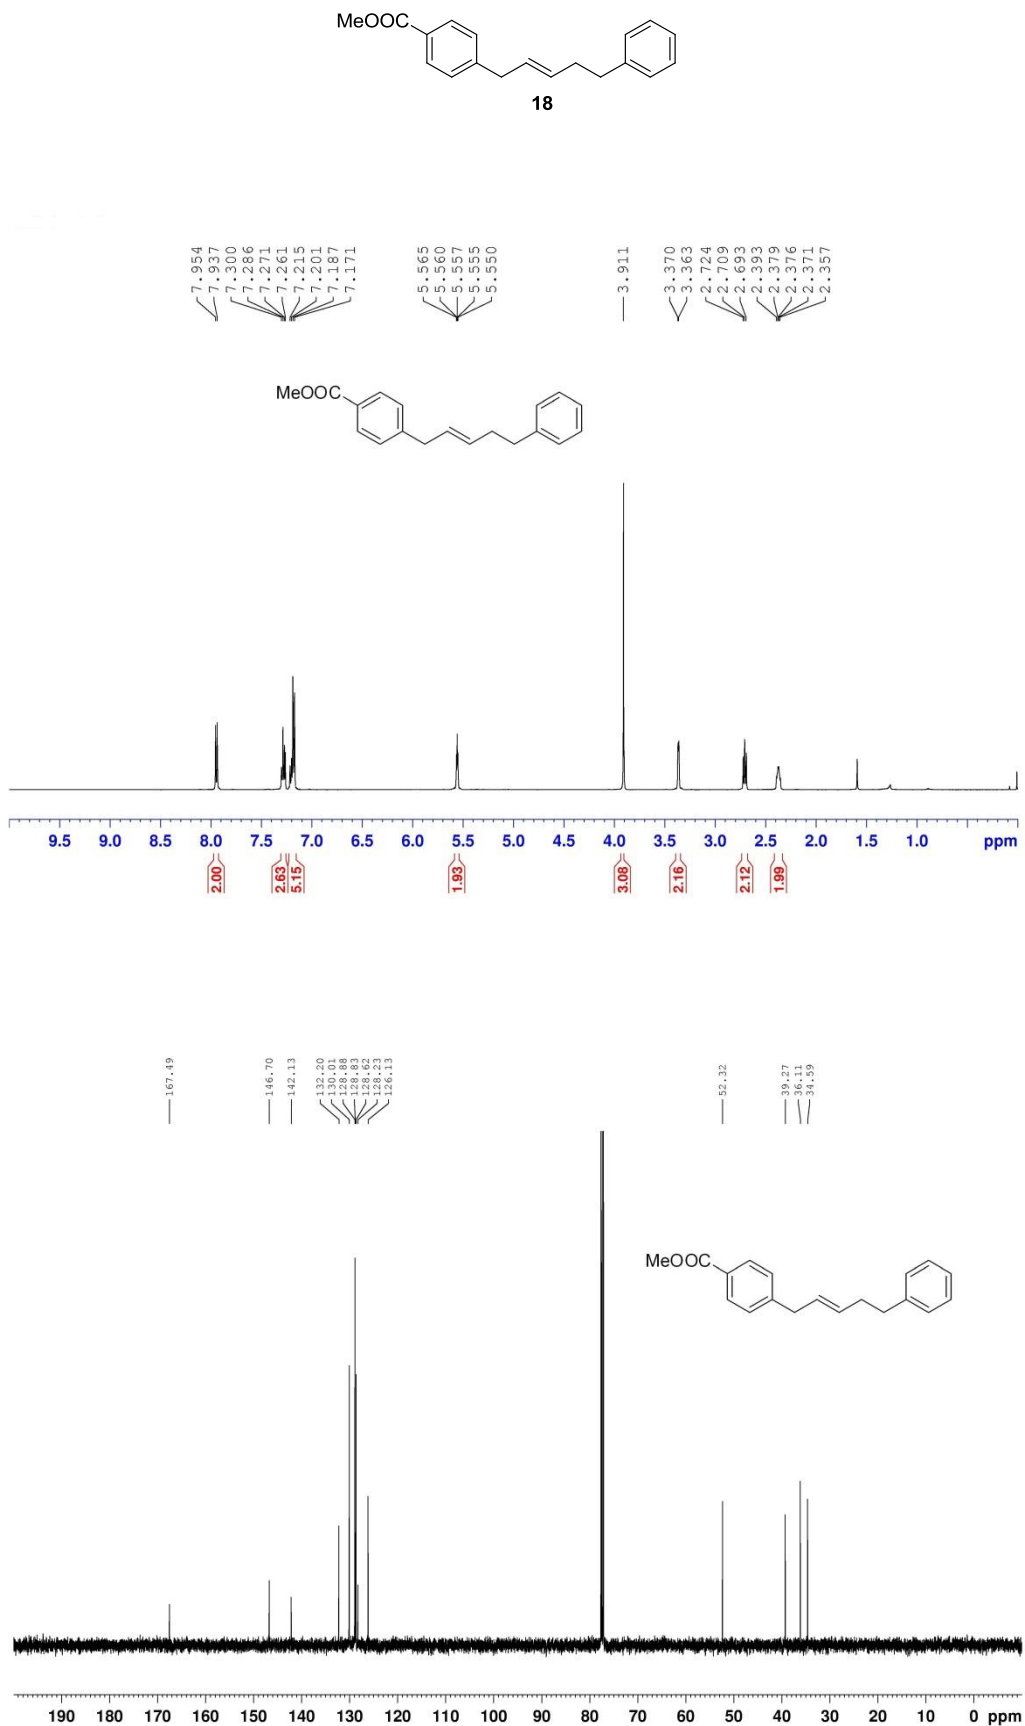

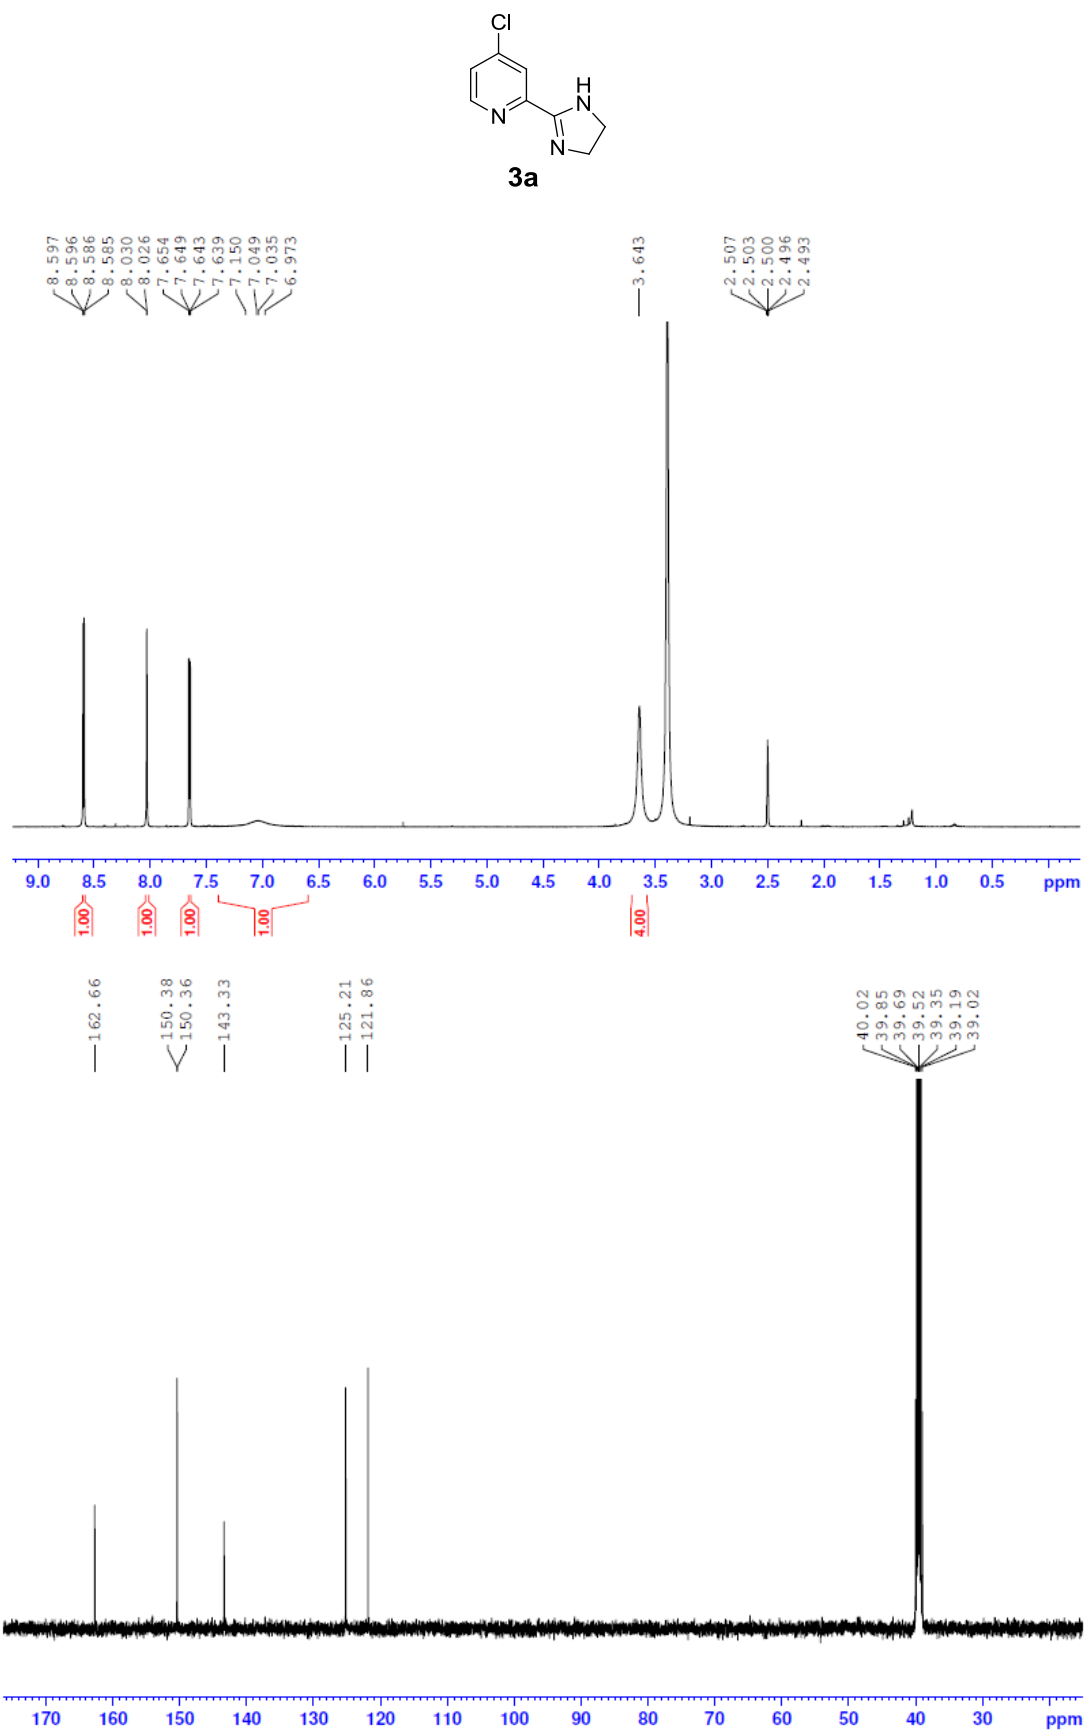

## 7. The Data of HPLC for Asymmetric Coupling of 1,3-Disubstituted Allyl Acetate.<sup>(4)</sup>

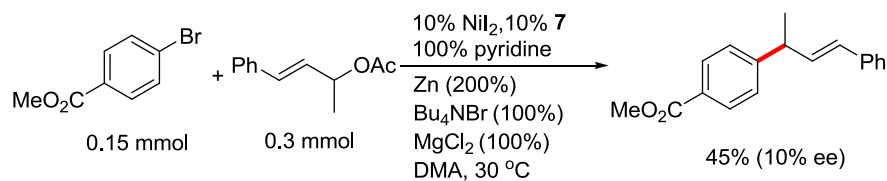

**Figure 1. The HPLC Data for Enantiomeric Production.**

2013-3-16 00:16:26 1 / 1

### ==== Shimadzu LCsolution 分析报告 ====

样品信息

采集人 : Admin  
 样品名称 : cxz-2  
 样品 ID : cxz-2  
 样品架# : 1  
 样品瓶# : 16  
 进样体积 : 10 uL  
 数据文件名 : cxz-2.lcd  
 方法文件名 : 色谱条件.1cm  
 批处理文件名 :  
 报告文件名 : BG01.lcr  
 数据采集 : 2013-3-15 21:57:16  
 数据处理 : 2013-3-15 22:41:43

<色谱图>

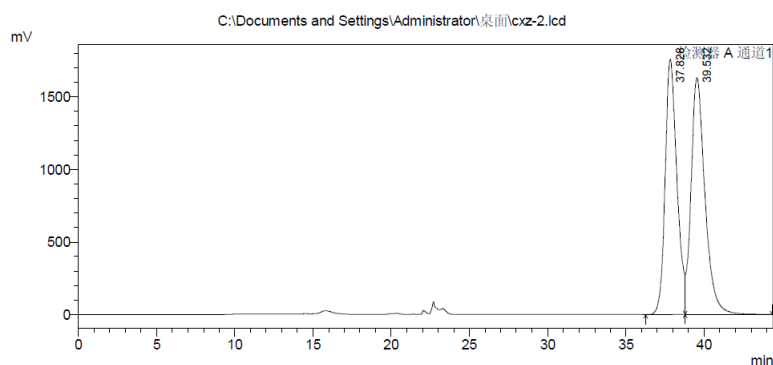

峰表

| 峰# | 保留时间   | 面积        | 高度      | 面积 %    | 浓度    | 理论塔板#     |
|----|--------|-----------|---------|---------|-------|-----------|
| 1  | 37.828 | 91835274  | 1758964 | 47.686  | 0.000 | 12325.257 |
| 2  | 39.532 | 100748657 | 1632086 | 52.314  | 0.000 | 10182.476 |
| 总计 |        | 192583931 | 3391050 | 100.000 |       |           |

C:\Documents and Settings\Administrator\桌面\cxz-2.lcd

## Figure 2. The HPLC Data for Asymmetric Production.

2013-3-16 00:15:01 1 / 1

### ==== Shimadzu LCsolution 分析报告 ====

#### 样品信息

采集人 : Admin  
样品名称 : cxz-1  
样品 ID : cxz-1  
样品架# : 1  
样品瓶# : 31  
进样体积 : 10 uL  
数据文件名 : cxz-1.lcd  
方法文件名 : 色谱条件.lcm  
批处理文件名 :  
报告文件名 : BG01.lcr  
数据采集 : 2013-3-15 21:06:04  
数据处理 : 2013-3-15 21:52:14

#### <色谱图>

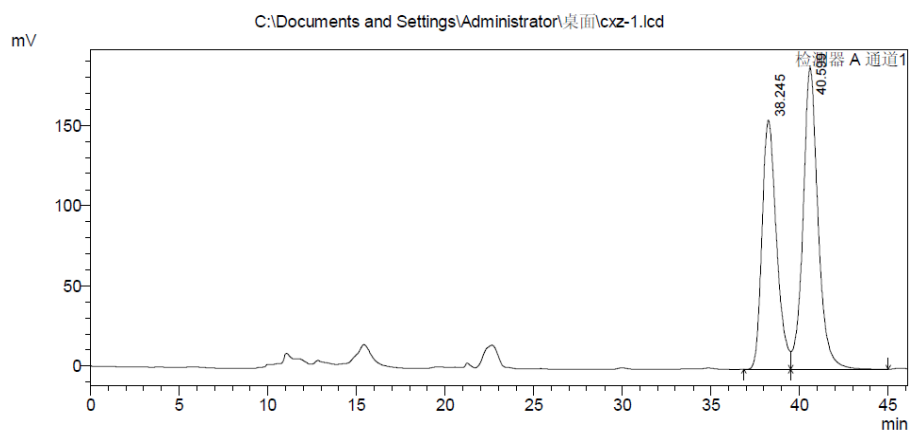

#### 峰表

| 峰# | 保留时间   | 面积       | 高度     | 面积 %    | 浓度    | 理论塔板#     |
|----|--------|----------|--------|---------|-------|-----------|
| 1  | 38.245 | 8822389  | 155386 | 44.366  | 0.000 | 10717.999 |
| 2  | 40.599 | 11063201 | 188283 | 55.634  | 0.000 | 12391.365 |
| 总计 |        | 19885590 | 343669 | 100.000 |       |           |

C:\Documents and Settings\Administrator\桌面\cxz-1.lcd



## 8. The references for known products

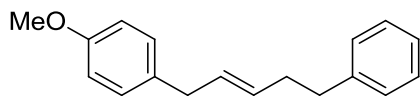

*(E)*-1-methoxy-4-(5-phenylpent-2-en-1-yl)benzene(10)<sup>(5)</sup>

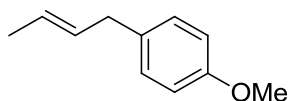

*(E)*-1-(but-2-en-1-yl)-4-methoxybenzene(11)<sup>(6)</sup>

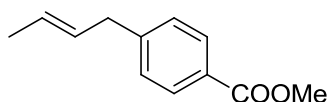

*(E)*-methyl 4-(but-2-en-1-yl)benzoate(19)<sup>(7)</sup>

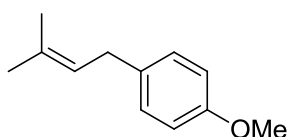

1-methoxy-4-(3-methylbut-2-en-1-yl)benzene(12)<sup>(8)</sup>

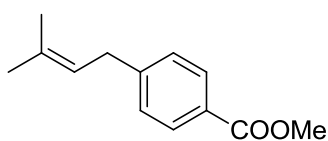

methyl 4-(3-methylbut-2-en-1-yl)benzoate(20)<sup>(9)</sup>

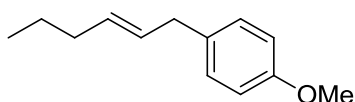

*(E)*-1-(hex-2-en-1-yl)-4-methoxybenzene(13)<sup>(10)</sup>

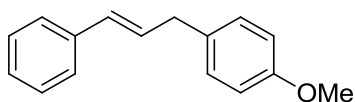

1-cinnamyl-4-methoxybenzene(14)<sup>(11)</sup>

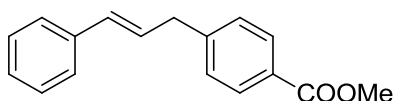

methyl 4-cinnamylbenzoate(22)<sup>(12)</sup>

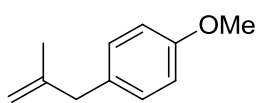

1-methoxy-4-(2-methylallyl)benzene(15)<sup>(13)</sup>

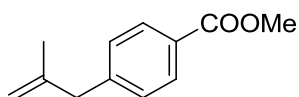

**methyl 4-(2-methylallyl)benzoate(23)**<sup>(14)</sup>

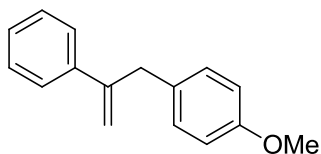

**1-methoxy-4-(2-phenylallyl)benzene(16)**<sup>(15)</sup>

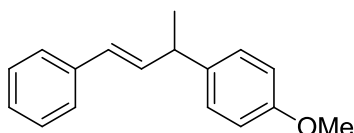

**(E)-1-methoxy-4-(4-phenylbut-3-en-2-yl)benzene(17)**<sup>(16)</sup>

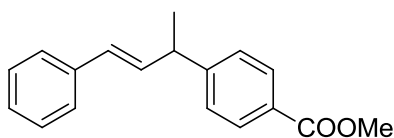

**(E)-methyl 4-(4-phenylbut-3-en-2-yl)benzoate(25)**<sup>(17)</sup>

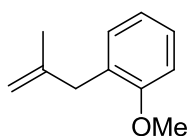

**1-methoxy-2-(2-methylallyl)benzene(29)**<sup>(18)</sup>

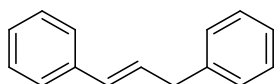

**(E)-prop-1-ene-1,3-diyl dibenzene(31)**<sup>(19)</sup>

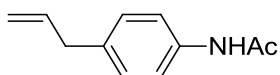

**N-(4-allylphenyl)acetamide(32)**<sup>(20)</sup>

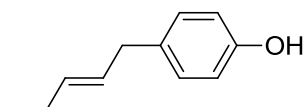

**(E)-4-(pent-2-en-1-yl)phenol(34)**<sup>(21)</sup>

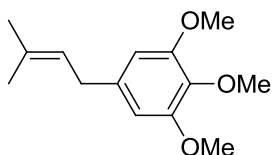

**1,2,3-trimethoxy-5-(3-methylbut-2-en-1-yl)benzene(35)**<sup>(22)</sup>

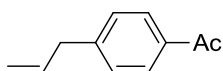

**1-(4-allylphenyl)ethanone(33)**<sup>(23)</sup>

- 
- (1) Scott E. D; Robert A. S; Anne-Marie F; James P. E. *J. Org. Chem.*, 1997, **62**, 3375-3389.
- (2) Mark R; M. Mahmum. H. *Tetrahedron Lett.*, 2004, **45**, 8987-8990.
- (3) Malkov, A. V.; Liddon, A. J. P. S.; Ramírez-López, P.; Bendová, L.; Haigh, D.; Kočovský, P. *Angew. Chem. Int. Ed.*, 2006, **45**, 1432.
- (4) Experimental conditions for HPLC: Isopropanol: Hexane = 5: 95; Pump pressure: 3.0 MPa.  
Column: CHIRALPAK. AD-H, Lot No. ADHOCE-OB110; DAICEL CHEMICAL INDUSTRIES, LTD; Column Size: 250 x 4.6 mm analytical; Detection wavelength: 254nm.

| Time (min) | Mobile phase         | Flow rate  |
|------------|----------------------|------------|
| 0          | 95.0/5.0 Hexane: IPA | 0.3 mL/min |
| 45         | 95.0/5.0 Hexane: IPA | 0.3 mL/min |

- (5) Evans, P. Andrew; Uruguchi, Daisuke. *J. Am. Chem. Soc.*, 2003, **125**, 7158 – 7159.
- (6) Denmark, Scott E.; Werner, Nathan S. *J. Am. Chem. Soc.*, 2008, **130**, 16382 – 16393.
- (7) Gomes, Paulo; Gosmini, Corinne; Perichon, Jacques. *J. Org. Chem.*, 2003, **68**, 1142 – 1145.
- (8) Valle, L. Del; Stille, J. K.; Hegedus, L. S. *J. Org. Chem.*, 1990, **55**, 3019 – 3023.
- (9) Hatanaka, Yasuo; Goda, Ken-ichi; Hiyama, Tamejiro. *Tetrahedron Lett.*, 1994, **35**, 6511–6514.
- (10) Fukuoka, Satoshi; Nanri, Hiroshi; Katsuki, Tsutomu; Yamaguchi, Masaru. *Tetrahedron Lett.*, 1987, **28**, 6205 – 6206.
- (11) Chatterjee, Pares Nath; Roy, Sujit. *Tetrahedron.*, 2012, **68**, 3776 – 3785.
- (12) Li, Man-Bo; Wang, Yong; Tian, Shi-Kai. *Angew. Chem. Int. Ed.*, 2012, **51**, 2968 – 2971.
- (13) Iwasaki, Masayuki; Hayashi, Sayuri; Hirano, Koji; Yorimitsu, Hideki; Oshima, Koichiro. *Tetrahedron*, 2007, **63**, 5200 – 5203.
- (14) Sinha, Subhash C.; Keinan, Ehud; Reymond, Jean-Louis. *J. Am. Chem. Soc.*, 1993, **115**, 4893 – 4894.
- (15) Organ, Michael G.; Arvanitis, Elena A.; Villani, Anita; Majkut, Yvette; Hynes, Stephen. *Tetrahedron Lett.*, 2003, **44**, 4403 – 4406.
- (16) Liao, Longyan; Sigman, Matthew S. *J. Am. Chem. Soc.*, 2010, **132**, 10209 – 10211.
- (17) Liao, Longyan; Sigman, Matthew S. *J. Am. Chem. Soc.*, 2010, **132**, 10209 – 10211.
- (18) Ruechardt, C.; Eichler, S. *Chemische Berichte*, 1962, **95**, 1921 – 1942.

- (19) Uozumi, Yasuhiro; Danjo, Hiroshi; Hayashi, Tamio. *J. Org. Chem.*, 1999, **64**, 3384 – 3388.
- (20) Ortar, Giorgio. *Tetrahedron Lett*, 2003, **44**, 4311 – 4314.
- (21) Kakhniashvili; Chikovani. *Soobshcheniya Akademii Nauk Gruzinskoi SSR.*, 1969, **53**, 93.
- (22) Farmer, Jennifer L.; Hunter, Howard N.; Organ, Michael G. *J. Am. Chem. Soc.*, 2012, **134**, 17470 – 17473.
- (23) Lee, Phil Ho; Sung, Sun-young; Lee, Kooyeon. *Org. Lett.*, 2001, **3**, 3201 – 3204.
